# Supplementary material for: TIcagrelor in Rotational Atherectomy to Reduce TROPonin Enhancement: The TIRATROP Study, A Randomized Controlled Trial
Source: MDPI journal article supplement (doi:10.3390/jcm12041445), 2023-02-11
Supplement: s1 [file s1]

## **On line only supplementary Material S1 : Exclusion criteria**

Acute coronary syndrome with ST-elevation

Lesion located on a coronary bypass

Coronary thrombus diagnosed by angiography

Coronary dissection diagnosed by angiography

Left ventricular ejection fraction lower than 30%

Contraindication to Ticagrelor or Clopidogrel, as listed in the Summary of Product Characteristics

Known hypersensitivity to the active substance or to the excipients

Active pathological bleeding

History of intracranial hemorrhage

Moderate to severe hepatic impairment

Co-administration with a strong CYP3A4 inhibitor (e.g. ketokonazole, clarithromycin, nefazodone, ritonavir, and atazanavir)

Other conditions of increased risk of bleeding (congenital or acquired coagulation disorder, gastroduodenal bleeding within past 6 months, recent major trauma or surgery within past 30 days)

Concomitant use of fibrinolytics, oral anticoagulation, Gp IIb/IIIa inhibitors, non-steroidal anti-inflammatory drugs,

Significant anemia

Increased risk of bradycardia

History of severe asthma or severe Chronic Obstructive Pulmonary Disease

Uric acid nephropathy

Ischemic stroke within 7 days

Hereditary galactose intolerance, Lapp lactase deficiency, or glucose-galactose malabsorption

Concomitant use of a strong CYP3A4 inducer

Concomitant use of CYP3A4 substrates with narrow therapeutic indices (e.g. cisaprid, ergot alkaloids), simvastatin at a dose greater than 40 mg/d

Concomitant use of Selective Serotonin Reuptake inhibitors

Concomitant use of digoxin without close clinical and laboratory monitoring

Contraindication to Aspirin use

Breast-feeding

Pregnancy

Adult under protective administration

Patient participating in another biomedical study.

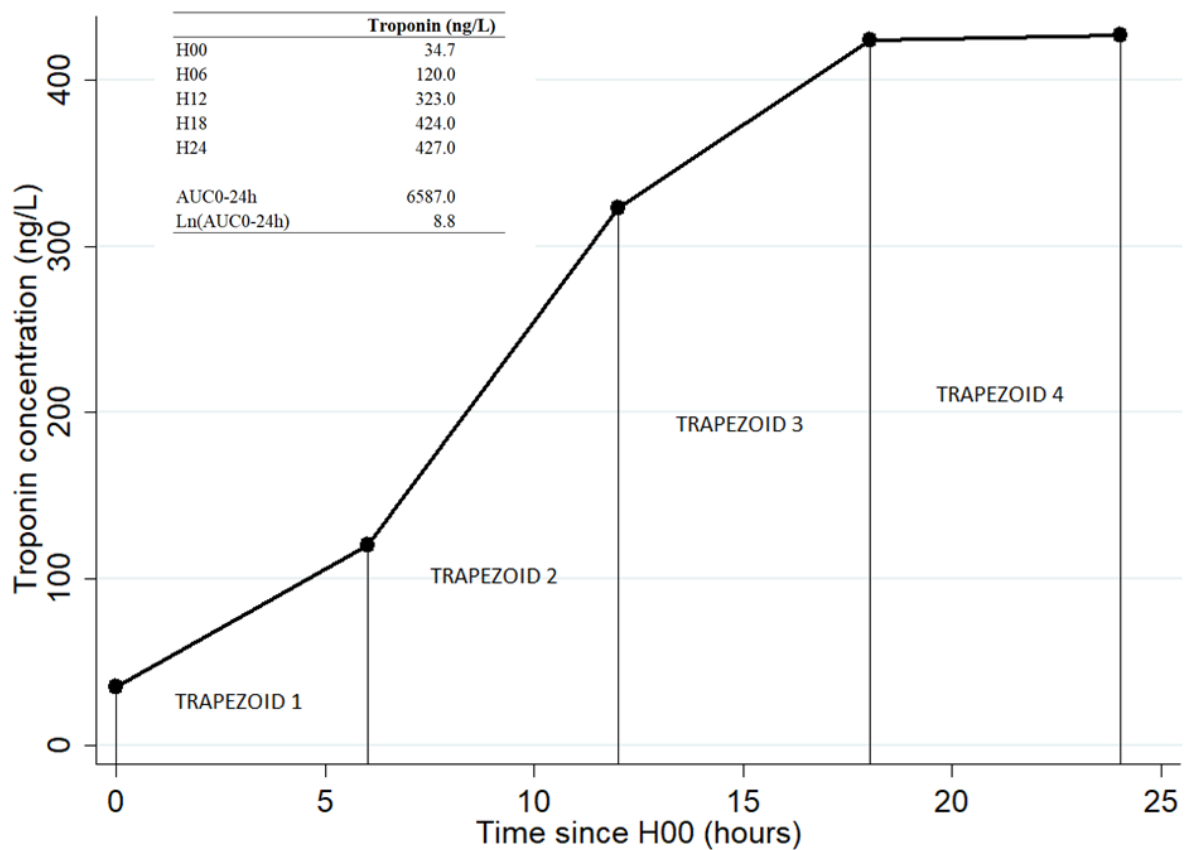

**Online-only Supplementary Material S2: Illustration of post-procedural high sensitivity troponin T release measurement and area under the curve calculation**

$$\text{AREA}_{\text{TRAPEZOID 1}} = 6 \times (34.7 + 120) / 2 = 464$$

$$\text{AREA}_{\text{TRAPEZOID 2}} = 6 \times (120 + 323) / 2 = 1329$$

$$\text{AREA}_{\text{TRAPEZOID 3}} = 6 \times (323 + 424) / 2 = 2241$$

$$\text{AREA}_{\text{TRAPEZOID 4}} = 6 \times (424 + 427) / 2 = 2553$$

$$\text{AUC 0-24h} = 464 + 1329 + 2241 + 2553 = 6587$$

AUC: Area under the curve

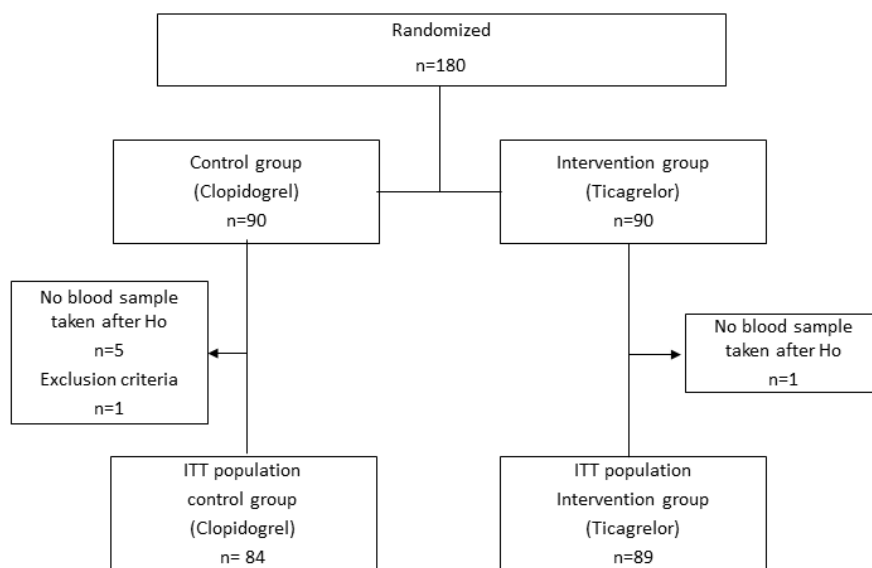

**On line only supplementary Material S3: study flow chart**

**Online-only Supplementary Material S4: Factors associated with troponin elevation**

(Ln(AUC24h)) – Univariate analysis

|                             | n     | Ln(AUC 24h)   | p       |
|-----------------------------|-------|---------------|---------|
| Clinical status             |       |               | < 0.001 |
| Stable angina               | 151   | 7.6 +/- 1.0 * |         |
| Post Acute ACS              | 22    | 9.1 +/- 1.1   |         |
| Gender                      |       |               | 0.020   |
| Male                        | 132   | 7.7 +/- 1.1   |         |
| Female                      | 41    | 8.1 +/- 1.3   |         |
| Age (years)                 | 173 † | 0.179         | 0.019   |
| CARDIOVASCULAR RISK FACTORS |       |               |         |
| Smoking                     |       |               | 0.411   |
| No                          | 88    | 7.9 +/- 1.1   |         |
| Former smoker               | 62    | 7.7 +/- 1.2   |         |
| Current smoker              | 22    | 7.7 +/- 1.4   |         |
| Arterial hypertension       |       |               | 0.100   |
| No                          | 48    | 7.6 +/- 0.9   |         |
| Yes                         | 125   | 7.9 +/- 1.2   |         |
| Hypercholesterolaemia       |       |               | 0.067   |
| No                          | 83    | 7.9 +/- 1.2   |         |
| Yes                         | 89    | 7.6 +/- 1.0   |         |
| Type 2 Diabetes mellitus    |       |               | 0.506   |
| No                          | 112   | 7.7 +/- 1.2   |         |

|                                 |     |             |       |
|---------------------------------|-----|-------------|-------|
| Yes                             | 61  | 7.9 +/- 1.1 |       |
| INITIAL CLINICAL PARAMETERS     |     |             |       |
| BMI (kg/m <sup>2</sup> )        | 173 | -0.036      | 0.640 |
| Cardiac frequency (bpm)         | 172 | 0.106       | 0.167 |
| Systolic Blood Pressure (mmHg)  | 171 | 0.073       | 0.345 |
| Diastolic Blood Pressure (mmHg) | 171 | -0.092      | 0.229 |
| LVEF (%)                        | 121 | -0.057      | 0.536 |
| INITIAL BIOLOGICAL PARAMETERS   |     |             |       |
| Total cholesterol (mmol/L)      | 122 | 0.108       | 0.238 |
| HDL cholesterol (mmol/L)        | 122 | -0.010      | 0.910 |
| LDL cholesterol (mmol/L)        | 122 | 0.082       | 0.369 |
| Haemoglobin (g/100 mL)          | 166 | -0.217      | 0.005 |
| Platelets (thousands of cells)  | 164 | -0.037      | 0.636 |
| Glycaemia (mmol/l)              | 77  | 0.331       | 0.003 |
|                                 |     |             | 0.004 |
| GFR (mL/min/1.73m2) ‡           |     |             |       |
| ≥ 60                            | 111 | 7.6 +/- 1.1 |       |
| < 60                            | 61  | 8.1 +/- 1.1 |       |
| C-Reactive protein (mg/L)       | 150 | 0.207       | 0.011 |
| Leucocytes (cells)              | 168 | -0.049      | 0.528 |
| INITIAL CORONAROGRAPHY          |     |             |       |
| Left main                       |     |             | 0.370 |
| < 50%                           | 109 | 7.7 +/- 1.1 |       |

|                                  |     |             |       |
|----------------------------------|-----|-------------|-------|
| ≥ 50%                            | 63  | 7.9 +/- 1.2 |       |
| LAD                              |     |             | 0.304 |
| < 50%                            | 14  | 7.5 +/- 1.1 |       |
| ≥ 50%                            | 159 | 7.8 +/- 1.1 |       |
| Cx                               |     |             | 0.597 |
| < 50%                            | 57  | 7.7 +/- 1.2 |       |
| ≥ 50%                            | 116 | 7.8 +/- 1.2 |       |
| RCA                              |     |             | 0.521 |
| < 50%                            | 33  | 7.9 +/- 1.3 |       |
| ≥ 50%                            | 140 | 7.8 +/- 1.1 |       |
| ROTATIONAL ATHERECTOMY PROCEDURE |     |             |       |
| RA procedure for left main       |     |             | 0.938 |
| No                               | 140 | 7.8 +/- 1.2 |       |
| Yes                              | 31  | 7.8 +/- 1.0 |       |
| RA procedure for LAD             |     |             | 0.066 |
| No                               | 83  | 7.6 +/- 1.0 |       |
| Yes                              | 88  | 8.0 +/- 1.2 |       |
| RA procedure for Cx              |     |             | 0.173 |
| No                               | 146 | 7.7 +/- 1.1 |       |
| Yes                              | 25  | 8.1 +/- 1.4 |       |
| RA procedure for RCA             |     |             | 0.498 |
| No                               | 109 | 7.8 +/- 1.2 |       |
| Yes                              | 62  | 7.7 +/- 1.0 |       |

|                                                  |     |             |  |         |
|--------------------------------------------------|-----|-------------|--|---------|
| Vascular access                                  |     |             |  | 0.235   |
| Radial                                           | 124 | 7.7 +/- 1.1 |  |         |
| Femoral                                          | 23  | 8.0 +/- 1.3 |  |         |
| Sheath caliber (Fr)                              |     |             |  | 0.170   |
| 6                                                | 135 | 7.8 +/- 1.1 |  |         |
| 7                                                | 12  | 7.4 +/- 1.0 |  |         |
| Procedural success                               |     |             |  | 0.716   |
| Yes                                              | 169 | 7.8 +/- 1.1 |  |         |
| No                                               | 4   | 8.0 +/- 0.8 |  |         |
| Number of lesions treated with RA                |     |             |  | < 0.001 |
| 1                                                | 123 | 7.6 +/- 1.1 |  |         |
| > 1                                              | 48  | 8.3 +/- 1.1 |  |         |
| Reference Vessel Diameter (mm) §                 | 171 | -0.2        |  | 0.009   |
| Predilatation                                    |     |             |  | 0.308   |
| No                                               | 11  | 8.1 +/- 1.0 |  |         |
| Yes                                              | 158 | 7.8 +/- 1.1 |  |         |
| PCI for another lesion during the same procedure |     |             |  | 0.345   |
| No                                               | 120 | 7.9 +/- 1.2 |  |         |
| Yes                                              | 51  | 7.7 +/- 0.9 |  |         |
| Burr diameter                                    |     |             |  | 0.903   |
| 1.25                                             | 20  | 7.8 +/- 0.9 |  |         |
| 1.5                                              | 117 | 7.9 +/- 1.2 |  |         |



|                                       |     |             |       |
|---------------------------------------|-----|-------------|-------|
| > 1.5                                 | 35  | 7.7 +/- 1.1 |       |
| Ratio Burr diameter / Vessel diameter | 170 | 0.156       | 0.042 |
| Minimal speed used (rev/min)          | 170 | -0.091      | 0.237 |
| Maximal speed used (rev/min)          | 170 | -0.078      | 0.316 |
| Total number of burr runs             | 171 | 0.112       | 0.144 |
| Total RA duration (seconds)           | 173 | 0.111       | 0.138 |

---

\* Mean Ln(AUC 24h) +/- standard deviation.

† Spearman correlation coefficient.

‡ computed using the MDRD formula.

§ the smallest if several lesions treated using RA.

|| the largest if several burrs used.

ACS: Acute coronary syndrome. Cx: Left circumflex artery. GFR: Glomerular filtration rate. HDL: High density lipoprotein. LAD: Left anterior descending artery. LDL: Low density lipoprotein. LVEF: Left ventricular ejection fraction. PCI: Percutaneous coronary intervention. RA: Rotational atherectomy. RCA: Right coronary artery.

# Online-only Supplementary Material S5 : Procedural and in-hospital outcomes (SAFETY

Population, n=178)

|                           | CLOPIDOGREL (n=88) |     |           | TICAGRELOR (n=90) |     |            | p-value |
|---------------------------|--------------------|-----|-----------|-------------------|-----|------------|---------|
|                           | n                  | %   | CI 95%    | n                 | %   | CI 95%     |         |
| Death                     | 1                  | 1.1 | 0.0 – 3.3 | 0                 | 0.0 |            | 0.494   |
| Major Bleeding *          | 1                  | 1.1 | 0.0 - 3.3 | 1                 | 1.1 | 0.0 - 3.3  | 1.000   |
| Minor Bleeding (BARC < 3) | 4                  | 4.5 | 0.2 - 8.8 | 3                 | 3.3 | 0.0 - 7.0  | 0.719   |
| Coronary dissection       | 1                  | 1.1 | 0.0 - 3.3 | 6                 | 6.7 | 1.5 - 11.9 | 0.118   |
| Myocardial infarction     | 0                  | 0.0 | -         | 1                 | 1.1 | 0.0 - 3.3  | 0.506   |
| Ischemic stroke           | 1                  | 1.1 | 0.0 - 3.3 | 0                 | 0.0 | -          | 0.494   |
| Stent thrombosis          | 0                  | 0.0 | -         | 0                 | 0.0 | -          | 1.000   |

\* BARC ≥ 3 or haemopericardium or coronary perforation.

CI : Confidence interval.
